# Supplementary material
Source: PubMed Central journal article supplement (PMC6039910)
Supplement: JIP767759_Suppl_Mat.pdf [file JIP767759_Suppl_Mat.pdf]

| CVAD (CVC managed by the CVAD on general wards) |                                                                | Aug-15 | Sep-15 | Oct-15 | Nov-15 | Dec-15 | Jan-16 | Feb-16 | Mar-16 | Apr-16 | May-16 | Jun-16 | Jul-16 | Total |
|-------------------------------------------------|----------------------------------------------------------------|--------|--------|--------|--------|--------|--------|--------|--------|--------|--------|--------|--------|-------|
| 1                                               | Number of CVC days                                             | 442    | 551    | 667    | 688    | 590    | 1015   | 1025   | 715    | 794    | 844    | 490    | 270    | 8101  |
|                                                 | Number of Infections                                           | 0      | 2      | 0      | 2      | 0      | 1      | 0      | 0      | 1      | 0      | 0      | 0      | 6     |
|                                                 | Infection rate per 1000 CVC days                               | 0.00   | 3.63   | 0.00   | 2.91   | 0.00   | 0.99   | 0.00   | 0.00   | 1.26   | 0.00   | 0.00   | 0.00   | 0.74  |
|                                                 | Cumulative Infection rate per 1000 CVC days (12 month rolling) | 0.33   | 0.63   | 0.64   | 0.94   | 0.92   | 0.99   | 0.91   | 0.76   | 0.75   | 0.73   | 0.72   | 0.74   | 0.74  |

98 days since last infection

| Critical Care |                                                                | Aug-15 | Sep-15 | Oct-15 | Nov-15 | Dec-15 | Jan-16 | Feb-16 | Mar-16 | Apr-16 | May-16 | Jun-16 | Jul-16 | 12 Month Total |
|---------------|----------------------------------------------------------------|--------|--------|--------|--------|--------|--------|--------|--------|--------|--------|--------|--------|----------------|
| 2             | Number of CVC days                                             | 237    | 267    | 259    | 192    | 243    | 262    | 282    | 355    | 221    | 294    | 211    | 186    | 2999           |
|               | Number of Infections                                           | 0      | 0      | 0      | 0      | 0      | 1      | 0      | 0      | 0      | 0      | 0      | 0      | 1              |
|               | Infection rate per 1000 CVC days                               | 0.00   | 0.00   | 0.00   | 0.00   | 0.00   | 3.82   | 0.00   | 0.00   | 0.00   | 0.00   | 0.00   | 0.00   | 0.33           |
|               | Cumulative Infection rate per 1000 CVC days (12 month rolling) | 1.57   | 1.57   | 0.65   | 0.53   | 0.34   | 0.34   | 0.34   | 0.33   | 0.34   | 0.33   | 0.33   | 0.33   | 0.33           |

183 days since last infection

| Onc/Neuro ward |                                                                | Aug-15 | Sep-15 | Oct-15 | Nov-15 | Dec-15 | Jan-16 | Feb-16 | Mar-16 | Apr-16 | May-16 | Jun-16 | Jul-16 | 12 Month Total |
|----------------|----------------------------------------------------------------|--------|--------|--------|--------|--------|--------|--------|--------|--------|--------|--------|--------|----------------|
| 3              | Number of CVC days                                             | 2256   | 2280   | 2330   | 2200   | 2136   | 2424   | 2042   | 2434   | 2127   | 1898   | 1935   | 2075   | 26137          |
|                | Number of Infections                                           | 1      | 2      | 1      | 2      | 1      | 0      | 1      | 0      | 0      | 1      | 1      | 0      | 10             |
|                | Infection rate per 1000 CVC days                               | 0.44   | 0.88   | 0.43   | 0.91   | 0.47   | 0.00   | 0.49   | 0.00   | 0.00   | 0.53   | 0.52   | 0.00   | 0.38           |
|                | Cumulative Infection rate per 1000 CVC days (12 month rolling) | 0.66   | 0.70   | 0.66   | 0.70   | 0.57   | 0.51   | 0.47   | 0.38   | 0.37   | 0.41   | 0.46   | 0.38   | 0.38           |

40 days since last infection

| OPAT |                                                                | Aug-15 | Sep-15 | Oct-15 | Nov-15 | Dec-15 | Jan-16 | Feb-16 | Mar-16 | Apr-16 | May-16 | Jun-16 | Jul-16 | 12 Month Total |
|------|----------------------------------------------------------------|--------|--------|--------|--------|--------|--------|--------|--------|--------|--------|--------|--------|----------------|
| 4    | Number of CVC days                                             | 113    | 47     | 2      | 252    | 165    | 86     | 49     | 76     | 52     | 112    | 65     | 135    | 1946           |
|      | Number of Infections                                           | 0      | 0      | 0      | 0      | 0      | 0      | 0      | 0      | 0      | 0      | 0      | 0      | 0              |
|      | Infection rate per 1000 CVC days                               | 0.00   | 0.00   | 0.00   | 0.00   | 0.00   | 0.00   | 0.00   | 0.00   | 0.00   | 0.00   | 0.00   | 0.00   | 0.00           |
|      | Cumulative Infection rate per 1000 CVC days (12 month rolling) | 0      | 0      | 0      | 0      | 0      | 0      | 0      | 0      | 0      | 0      | 0      | 0      | 0.00           |

0 infections

| Neo-Neonatal unit |                                                                | Aug-15 | Sep-15 | Oct-15 | Nov-15 | Dec-15 | Jan-16 | Feb-16 | Mar-16 | Apr-16 | May-16 | Jun-16 | Jul-16 | 12 Month Total |
|-------------------|----------------------------------------------------------------|--------|--------|--------|--------|--------|--------|--------|--------|--------|--------|--------|--------|----------------|
| 6                 | Number of CVC days                                             | 78     | 20     | 37     | 56     | 58     | 55     | 41     | 107    | 54     | 55     | 97     | 69     | 727            |
|                   | Number of Infections                                           | 0      | 0      | 0      | 0      | 1      | 0      | 0      | 0      | 2      | 0      | 0      | 0      | 3              |
|                   | Infection rate per 1000 CVC days                               | 0.00   | 0.00   | 0.00   | 0.00   | 17.24  | 0.00   | 0.00   | 0.00   | 37.04  | 0.00   | 0.00   | 0.00   | 4.13           |
|                   | Cumulative Infection rate per 1000 CVC days (12 month rolling) | 0      | 0      | 0.00   | 0.00   | 1.60   | 1.64   | 1.64   | 1.56   | 4.65   | 4.64   | 4.24   | 4.13   | 4.13           |

102 days since last infection

| Community |                                                                | Aug-15 | Sep-15 | Oct-15 | Nov-15 | Dec-15 | Jan-16 | Feb-16 | Mar-16 | Apr-16 | May-16 | Jun-16 | Jul-16 | 12 Month Total |
|-----------|----------------------------------------------------------------|--------|--------|--------|--------|--------|--------|--------|--------|--------|--------|--------|--------|----------------|
| 7         | Number of CVC days                                             |        |        |        |        |        |        |        |        |        |        |        |        | 0              |
|           | Number of Infections                                           | 0      | 0      | 0      | 0      | 0      | 0      | 1      | 0      | 0      | 0      | 0      | 0      | 1              |
|           | Infection rate per 1000 CVC days                               |        |        |        |        |        |        |        |        |        |        |        |        |                |
|           | Cumulative Infection rate per 1000 CVC days (12 month rolling) | -      | -      | -      | -      | -      | -      | -      | -      | -      | -      | -      | -      | -              |

181 days since last infection

| Trust Position |                                                                | Aug-15 | Sep-15 | Oct-15 | Nov-15 | Dec-15 | Jan-16 | Feb-16 | Mar-16 | Apr-16 | May-16 | Jun-16 | Jul-16 | 12 Month Total |
|----------------|----------------------------------------------------------------|--------|--------|--------|--------|--------|--------|--------|--------|--------|--------|--------|--------|----------------|
| 8              | Number of CVC days                                             | 3126   | 3165   | 3315   | 3388   | 3182   | 3842   | 3439   | 3687   | 3248   | 3193   | 2798   | 2735   | 39118          |
|                | Number of Infections                                           | 1      | 4      | 1      | 4      | 2      | 2      | 1      | 0      | 3      | 1      | 1      | 0      | 20             |
|                | Infection rate per 1000 CVC days                               | 0.32   | 1.26   | 0.30   | 1.18   | 0.63   | 0.52   | 0.29   | 0.00   | 0.92   | 0.31   | 0.36   | 0.00   | 0.51           |
|                | Target Line                                                    | 1.00   | 1.00   | 1.00   | 1.00   | 1.00   | 1.00   | 1.00   | 1.00   | 1.00   | 1.00   | 1.00   | 1.00   | 1.00           |
|                | Cumulative Infection rate per 1000 CVC days (12 month rolling) | 0.65   | 0.75   | 0.61   | 0.67   | 0.62   | 0.59   | 0.55   | 0.46   | 0.50   | 0.53   | 0.56   | 0.51   | 0.51           |

40 days since last infection
